# Supplementary material for: Young People’s Choice and Voice Concerning Sex and Relationships: Effects of the Multicomponent Get Up Speak Out! Programme in Iganga, Uganda
Source: Research Square preprint supplement (doi:10.21203/rs.3.rs-915273/v1), 2021-09-30
Supplement: Supplementary file 2 [file a3c566842900bd30440c8c4d.pdf]

Additional file 3

Description of outcome variables

| Variable                                                                                    | Definition                                                                                                                                                           | Question asked in the survey                                                                                                                                                                                                                                                                                                                                                                                                                                                       | Response options                                                                                               |
|---------------------------------------------------------------------------------------------|----------------------------------------------------------------------------------------------------------------------------------------------------------------------|------------------------------------------------------------------------------------------------------------------------------------------------------------------------------------------------------------------------------------------------------------------------------------------------------------------------------------------------------------------------------------------------------------------------------------------------------------------------------------|----------------------------------------------------------------------------------------------------------------|
| <u>Sex and relationships</u>                                                                |                                                                                                                                                                      |                                                                                                                                                                                                                                                                                                                                                                                                                                                                                    |                                                                                                                |
| Ever had sexual intercourse                                                                 | Percentage of youth (15-24 years) who have ever had sexual intercourse                                                                                               | Have you ever engaged in sexual intercourse                                                                                                                                                                                                                                                                                                                                                                                                                                        | Yes (1)<br>No (0)                                                                                              |
| <u>Self-expression</u>                                                                      |                                                                                                                                                                      |                                                                                                                                                                                                                                                                                                                                                                                                                                                                                    |                                                                                                                |
| I am able to express my feelings about sexuality and relationships                          | Percentage of youth (15-24 years) who agreed (strongly agreed or agreed) that they were able to express their feelings about sexuality and relationships             | Do you agree with the following statement: I am able to express my feelings about sexuality and relationships                                                                                                                                                                                                                                                                                                                                                                      | Strongly disagree (1)<br>Disagree (2)<br>Neutral (3)<br>Agree (4)<br>Strongly agree (5)<br>Not applicable (NA) |
| Ease in talking to these stakeholders about sexuality, contraception and relationships      | Percentage of youth (15-24 years) who felt at ease (easy and very easy) to talk to stakeholders about sexuality, contraception and relationships                     | How easy do you find it to talk to the following people about sexuality, contraception and relationships?<br>Please rate on a scale of 1-5 how easy it is. 1 being the most difficult and 5 being the easiest.<br>Health workers<br>Teachers<br>Girlfriend/boyfriend/spouse/partner<br>Peers<br>Parents<br>Other family members<br>Religious leaders<br>Traditional or community chiefs<br>(Local) political leader<br>Traditional or community chiefs<br>(Local) political leader | Very difficult (1)<br>Difficult (2)<br>Neutral (3)<br>Easy (4)<br>Very easy (5)<br>Not applicable (NA)         |
| <u>Decision-making</u>                                                                      |                                                                                                                                                                      |                                                                                                                                                                                                                                                                                                                                                                                                                                                                                    |                                                                                                                |
| I decide for myself who to date                                                             | Percentage of youth (15-24 years) who agree (strongly agree or agree) that they can decide for themselves whom to date                                               | Do you agree with the following statement: I decide for myself who to date                                                                                                                                                                                                                                                                                                                                                                                                         | Strongly disagree (1)<br>Disagree (2)<br>Neutral (3)<br>Agree (4)<br>Strongly agree (5)<br>Not applicable (NA) |
| I should have the choice to decide whom to marry                                            | Percentage of youth (15-24 years) who agreed (strongly agreed or agreed) that they should have the choice whom to marry                                              | Do you agree with the following statement: I should have the choice to decide whom to marry                                                                                                                                                                                                                                                                                                                                                                                        | Strongly disagree (1)<br>Disagree (2)<br>Neutral (3)<br>Agree (4)<br>Strongly agree (5)<br>Not applicable (NA) |
| I feel confident that I can use a condom every time I have sexual intercourse in the future | Percentage of youth (15-24 years) who agreed (strongly agreed or agreed) that they feel confident that they can use a condom every time they have sexual intercourse | Do you agree with the following statement: I feel confident that I can use a condom every time I have sexual intercourse                                                                                                                                                                                                                                                                                                                                                           | Strongly disagree (1)<br>Disagree (2)<br>Neutral (3)<br>Agree (4)<br>Strongly agree (5)<br>Not applicable (NA) |

|                                                                                        |                                                                                                                                               |                                                                                                                                                                                                                                                                                                                                                                                                       |                                                                                                                                   |
|----------------------------------------------------------------------------------------|-----------------------------------------------------------------------------------------------------------------------------------------------|-------------------------------------------------------------------------------------------------------------------------------------------------------------------------------------------------------------------------------------------------------------------------------------------------------------------------------------------------------------------------------------------------------|-----------------------------------------------------------------------------------------------------------------------------------|
| I find it appropriate for a boy to propose to use a condom                             | Percentage of youth (15-24 years) who agreed (strongly agreed or agreed) that they find it appropriate for a boy to propose condom use        | Do you agree with the following statement: I find it appropriate for a boy to propose condom use                                                                                                                                                                                                                                                                                                      | Strongly disagree (1)<br>Disagree (2)<br>Neutral (3)<br>Agree (4)<br>Strongly agree (5)<br>Not applicable (NA)                    |
| I find it appropriate for a girl to propose to use a condom                            | Percentage of youth (15-24 years) who agreed (strongly agreed or agreed) that they find it appropriate for a girl to propose condom use       | Do you agree with the following statement: I find it appropriate for a girl to propose condom use                                                                                                                                                                                                                                                                                                     | Strongly disagree (1)<br>Disagree (2)<br>Neutral (3)<br>Agree (4)<br>Strongly agree (5)<br>Not applicable (NA)                    |
| A couple should decide together if they want to have children                          | Percentage of youth (15-24 years) who agreed (strongly agreed or agreed) that a couple should decide together if they want to have children   | Do you agree with the following statement: I decide for myself who to date                                                                                                                                                                                                                                                                                                                            | Strongly disagree (1)<br>Disagree (2)<br>Neutral (3)<br>Agree (4)<br>Strongly agree (5)<br>Not applicable (NA)                    |
| Men should have the final word about decisions in the household                        | Percentage of youth (15-24 years) who agreed (strongly agreed or agreed) that men should have the final word about decisions in the household | Do you agree with the following statement: Men should have the final word about decisions in the household                                                                                                                                                                                                                                                                                            | Strongly disagree (1)<br>Disagree (2)<br>Neutral (3)<br>Agree (4)<br>Strongly agree (5)<br>Not applicable (NA)                    |
| I worry about being denied access to contraceptives                                    | Percentage of youth (15-24 years) who agreed (strongly agreed or agreed) that they worry about being denied access to contraceptives          | Do you agree with the following statement: I worry about being denied access to contraceptives                                                                                                                                                                                                                                                                                                        | Strongly disagree (1)<br>Disagree (2)<br>Neutral (3)<br>Agree (4)<br>Strongly agree (5)<br>Not applicable (NA)                    |
| Currently use contraception                                                            | Percentage of youth (15-24 years) who (currently) use contraception at the time of the survey                                                 | Do you currently use any contraception/family planning methods?                                                                                                                                                                                                                                                                                                                                       | Yes (1)<br>No (0)                                                                                                                 |
| Ever used SRH services                                                                 | Percentage of youth (15-24 years) who ever used SRH services                                                                                  | In general, which of the following services have you used? (can be before COVID-19)                                                                                                                                                                                                                                                                                                                   | Yes (1)<br>No (0)                                                                                                                 |
| I worry about being denied access to SRH services                                      | Percentage of youth (15-24 years) who agreed (strongly agreed or agreed) that they worry about being denied access to SRH services.           | Do you agree with the following statement: I worry about being denied access to SRH services                                                                                                                                                                                                                                                                                                          | Strongly disagree (1)<br>Disagree (2)<br>Neutral (3)<br>Agree (4)<br>Strongly agree (5)<br>Not applicable (NA)                    |
| Support felt by the following people in accessing sexuality education and SRH services | Percentage of youth who felt supported (supported and very supported) by stakeholders in accessing sexuality education and SRH services.      | Do you feel supported by the following people in accessing sexuality education and SRH services? Please rate on a scale of 1 to 5. 1 being the least supportive and 5 being the most supportive.<br>Health workers<br>Teachers<br>Girlfriend/boyfriend/spouse/partner<br>Peers<br>Parents<br>Other family members<br>Religious leaders<br>Traditional or community chiefs<br>(Local) political leader | Not supportive at all (1)<br>Not so supportive (2)<br>Neutral (3)<br>Supportive (4)<br>Very supportive (5)<br>Not applicable (NA) |

|  |  |                                                             |  |
|--|--|-------------------------------------------------------------|--|
|  |  | Traditional or community chiefs<br>(Local) political leader |  |
|--|--|-------------------------------------------------------------|--|
